# Supplementary material
Source: publisher figshare collection journal article supplement (https://tandf.figshare.com/articles/dataset/_/10250816)
Supplement: Supplementary file 1 [file 1]

# Technical Appendix

## Global Sourcing Decisions for a Multinational Firm With Foreign Tax Credit Planning

Vernon Hsu

Department of Decision Science & Managerial Economics, Chinese University of Hong Kong, Hong Kong, vhsu@cuhk.edu.hk

Qiaohai (Joice) Hu

Department of Supply Chain Analytics, University of Missouri St. Louis, joice.hu@gmail.com

---

### 1. Definitions of $\Delta$ s in Figures 1 and 2 and Derivation of Figure 2

#### 1.1. Definitions of $\Delta$ s in Figure 1

$$\Delta(O) = Pr\{D_1 < \theta_1 Q_1, D_2 < \theta_2 Q_2\}$$

$$\Delta(C_1) = Pr\{\theta_1 Q_1 < D_1 < Q_1, D_2 < \theta_2 Q_2\}$$

$$\Delta(C_2) = Pr\{\theta_1 Q_1 < D_1 < Q_1, D_2 < \theta_2 Q_2 + \frac{\tau_1 - \tau_0}{\tau_0 - \tau_2} \frac{1}{r_2 - s_2} [(r_1 - s_1)D_1 - (c_1 - s_1)Q_1]\}$$

$$\Delta(C_3) = Pr\{D_1 > Q_1, \theta_2 Q_2 < D_2 < \theta_2 Q_2 + \frac{\tau_1 - \tau_0}{\tau_0 - \tau_2} \gamma_1 Q_1\}$$

$$\Delta(C_4) = Pr\{D_1 > Q_1, D_2 < \theta_2 Q_2\}$$

$$\Delta(L_1) = Pr\{D_1 < \theta_1 Q_1, \theta_2 Q_2 < D_2 < Q_2\}$$

$$\Delta(L_2) = Pr\{D_1 < \theta_1 Q_1, D_2 > Q_2\}$$

$$\Delta(L_3) = Pr\{\theta_1 Q_1 < D_1 < Q_1, D_2 > Q_2\}$$

$$\Delta(L_4) = Pr\{D_1 > Q_1, D_2 > Q_2\}$$

$$\Delta(L_5) = Pr\{D_1 > Q_1, \theta_2 Q_2 + \frac{\tau_1 - \tau_0}{\tau_0 - \tau_2} \gamma_1 Q_1 < D_2 < Q_2\}$$

$$\Delta(L_6) = Pr\{\theta_1 Q_1 < D_1 < Q_1, \theta_2 Q_2 + \frac{\tau_1 - \tau_0}{\tau_0 - \tau_2} \gamma_1 Q_1 < D_2 < Q_2\}$$

$$\Delta(L_7) = Pr\{\theta_1 Q_1 < D_1 < Q_1, D_2 > \theta_2 Q_2 + \frac{\tau_1 - \tau_0}{\tau_0 - \tau_2} \frac{1}{r_2 - s_2} [(r_1 - s_1)D_1 - (c_1 - s_1)Q_1]\}$$

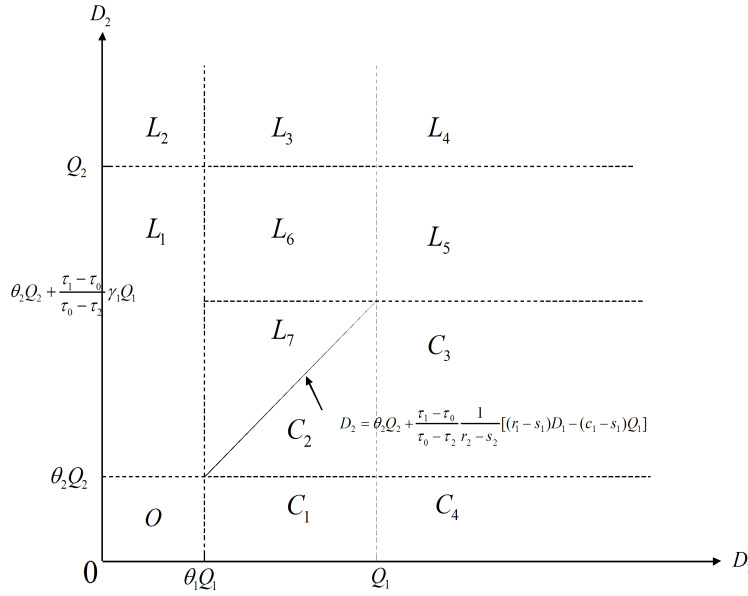

Figure 1 Demand Realization Regions under the  $L$  Condition.

### 1.2. Definition of $\Delta$ s in Figure 2

$$\Delta(O) = Pr\{D_1 < \theta_1 Q_1, D_2 < \theta_2 Q_2\}$$

$$\Delta(C_1) = Pr\{\theta_1 Q_1 < D_1 < \theta_1 Q_1 + \frac{\tau_0 - \tau_2}{\tau_1 - \tau_0} \gamma_2 Q_2, D_2 < \theta_2 Q_2\}$$

$$\Delta(C_2) = Pr\{\theta_1 Q_1 < D_1 < \theta_1 Q_1 + \frac{\tau_0 - \tau_2}{\tau_1 - \tau_0} \gamma_2 Q_2, D_2 < \theta_2 Q_2 + \frac{\tau_1 - \tau_0}{\tau_0 - \tau_2} \frac{1}{r_2 - s_2} [(r_1 - s_1) D_1 - (c_1 - s_1) Q_1]\}$$

$$\Delta(C_3) = Pr\{\theta_1 Q_1 + \frac{\tau_0 - \tau_2}{\tau_1 - \tau_0} \gamma_2 Q_2 < D_1 < Q_1, D_2 > Q_2\}$$

$$\Delta(C_4) = Pr\{D_1 > Q_1, D_2 > Q_2\}$$

$$\Delta(C_5) = Pr\{D_1 > Q_1, \theta_2 Q_2 < D_2 < Q_2\}$$

$$\Delta(C_6) = Pr\{\theta_1 Q_1 + \frac{\tau_0 - \tau_2}{\tau_1 - \tau_0} \gamma_2 Q_2 < D_1 < Q_1, \theta_2 Q_2 < D_2 < Q_2\}$$

$$\Delta(C_7) = Pr\{\theta_1 Q_1 + \frac{\tau_0 - \tau_2}{\tau_1 - \tau_0} \gamma_2 Q_2 < D_1 < Q_1, D_2 < \theta_2 Q_2\}$$

$$\Delta(C_8) = Pr\{D_1 > Q_1, D_2 < \theta_2 Q_2\}$$

$$\Delta(L_1) = Pr\{D_1 < \theta_1 Q_1, \theta_2 Q_2 < D_2 < Q_2\}$$

$$\Delta(L_2) = Pr\{D_1 < \theta_1 Q_1, D_2 > Q_2\}$$

$$\Delta(L_3) = Pr\{\theta_1 Q_1 < D_1 < \theta_1 Q_1 + \frac{\tau_0 - \tau_2}{\tau_1 - \tau_0} \gamma_2 Q_2, D_2 > Q_2\}$$

$$\Delta(L_4) = Pr\{\theta_1 Q_1 < D_1 < \theta_1 Q_1 + \frac{\tau_0 - \tau_2}{\tau_1 - \tau_0} \gamma_2 Q_2, D_2 > \theta_2 Q_2 + \frac{\tau_1 - \tau_0}{\tau_0 - \tau_2} \frac{1}{r_2 - s_2} [(r_1 - s_1) D_1 - (c_1 - s_1) Q_1]\}$$

### 1.3. Derivation of the First-Order Conditions Under Conditions $L$ , $C$ , and $E$

**Case 1.  $Q$  satisfies the  $L$  condition** Define  $\gamma_i = (r_i - c_i)/(r_j - s_j)$ ,  $i \neq j$  and note that  $\theta_i = (c_i - s_i)/(r_i - s_i)$ . Figure 1 shows different demand realization regions in which ex post either event  $L$

(in regions  $L_1$ - $L_7$ ) or event  $C$  (in regions  $C_1$ - $C_4$ ) occurs. Specifically, we note that when  $D_i < \theta_i Q_i$ ,  $i = 1, 2$ , neither subsidiary makes a profit, so no tax incurs in region  $O$ .

The partial derivatives of  $P^C(\mathbf{Q})$  with respect to  $Q_1$ , provided that  $\mathbf{Q}$  satisfies ex ante condition  $L$ , are as given by

$$\begin{aligned} \frac{\partial P^C(\mathbf{Q})}{\partial Q_1} = & -(c_1 - s_1)\{\Delta(O) + \Delta(L_1) + \Delta(L_2)\} - (1 - \tau_1)(c_1 - s_1)[\Delta(C_1) + \Delta(C_2)] \\ & - (1 - \tau_0)(c_1 - s_1)[\Delta(L_3) + \Delta(L_6) + \Delta(L_7)] + (1 - \tau_1)(r_1 - c_1)[\Delta(C_3) + \Delta(C_4)] \\ & + (1 - \tau_0)(r_1 - c_1)[\Delta(L_4) + \Delta(L_5)]. \end{aligned} \quad (1)$$

After collapsing terms, (1) can be rewritten as

$$\begin{aligned} \frac{\partial P^C(\mathbf{Q})}{\partial Q_1} = & (1 - \tau_1)[(r_1 - c_1)Pr\{D_1 > Q_1\} - (c_1 - s_1)Pr\{\theta_1 Q_1 < D_1 < Q_1\}] \\ & - (c_1 - s_1)Pr\{D_1 \leq \theta_1 Q_1\} + (\tau_1 - \tau_0)\left\{(r_1 - c_1)[\Delta(L_4) + \Delta(L_5)] \right. \\ & \left. - (c_1 - s_1)[\Delta(L_3) + \Delta(L_6) + \Delta(L_7)]\right\}. \end{aligned} \quad (2)$$

Equation (2) can be interpreted as follows: the first and second lines are the marginal profitability with respect to an increase of  $Q_1$  for the subsidiary  $S_1$  under its own after-local-tax profit maximization problem discussed earlier in Section 3 (see (10)). The third line represents the marginal benefits of the global firm due to tax cross-crediting across the two subsidiaries.

With a similar analysis, we can also derive the partial derivative of  $P^C(\mathbf{Q})$  with respect to  $Q_2$  as follows:

$$\begin{aligned} \frac{\partial P^C(\mathbf{Q})}{\partial Q_2} = & (1 - \tau_2)[(r_2 - c_2)Pr\{D_2 > Q_2\} - (c_2 - s_2)Pr\{\theta_2 Q_2 < D_2 < Q_2\}] \\ & - (c_2 - s_2)Pr\{D_2 \leq \theta_2 Q_2\} + (\tau_2 - \tau_0)\left\{(r_2 - c_2)[\Delta(L_2) + \Delta(L_3) + \Delta(L_4)] \right. \\ & \left. - (c_2 - s_2)[\Delta(L_1) + \Delta(L_5) + \Delta(L_6) + \Delta(L_7)]\right\}. \end{aligned} \quad (3)$$

The interpretation for (3) is similar to that for (2).

**Case 2.  $\mathbf{Q}$  satisfies the  $C$  condition**

We now turn to the situation in which a given sourcing decision  $\mathbf{Q}$  satisfies ex ante condition  $C$ . Figure 2 illustrates different demand realization regions. Similar to Figure 1, in region  $O$ , no tax incurs; in regions  $L_1$ - $L_4$ , we have event  $L$  ex post; and in regions  $C_1$ - $C_7$ , we have event  $C$  ex post.

Following a similar analysis as in Case 1, we can show that when  $\mathbf{Q}$  satisfies condition  $C$ , the partial derivatives are as follows:

$$\begin{aligned} \frac{\partial P^C(\mathbf{Q})}{\partial Q_1} = & (1 - \tau_1)[(r_1 - c_1)Pr\{D_1 > Q_1\} - (c_1 - s_1)Pr\{\theta_1 Q_1 < D_1 < Q_1\}] \\ & - (c_1 - s_1)Pr\{D_1 \leq \theta_1 Q_1\} - (\tau_1 - \tau_0)(c_1 - s_1)[\Delta(L_3) + \Delta(L_4)], \end{aligned} \quad (4)$$

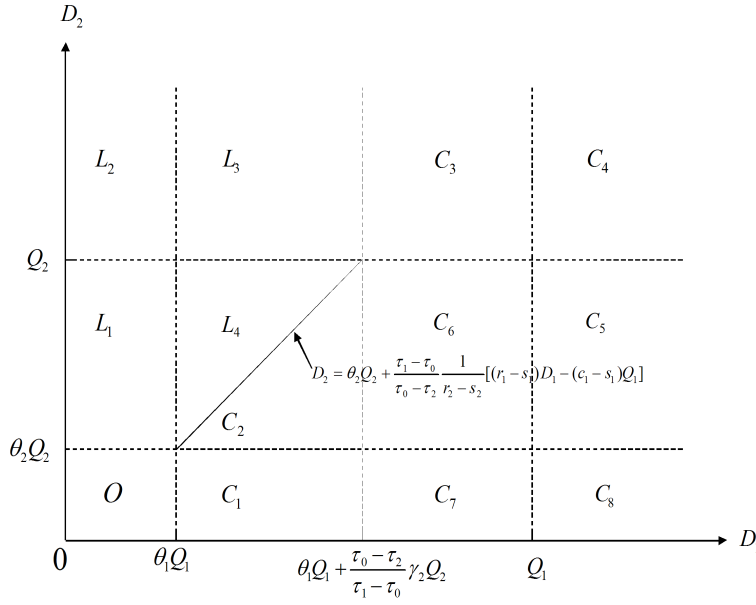

**Figure 2** Demand Realization Regions under the  $C$  Condition

and

$$\begin{aligned} \frac{\partial P^C(\mathbf{Q})}{\partial Q_2} = & (1 - \tau_2)[(r_2 - c_2)Pr\{D_2 > Q_2\} - (c_2 - s_2)Pr\{\theta_2 Q_2 < D_2 < Q_2\}] - (c_2 - s_2)Pr\{D_2 \leq \theta_2 Q_2\} \\ & - (\tau_0 - \tau_2)\{(r_2 - c_2)[\Delta(L_2) + \Delta(L_3)] - (c_2 - s_2)[\Delta(L_1) + \Delta(L_4)]\}. \end{aligned} \quad (5)$$

**Case 3.**  $\mathbf{Q}$  satisfies the *ex ante*  $E$  condition

Under this condition,  $\theta_1 Q_1 + \frac{\tau_0 - \tau_2}{\tau_1 - \tau_0} \gamma_2 Q_2 = Q_1$  and  $\theta_2 Q_2 + \frac{\tau_1 - \tau_0}{\tau_0 - \tau_2} \gamma_1 Q_1 = Q_2$ . As a result, Figures 1 and 2 become identical. Thus, if condition  $E$  holds,  $\mathbf{Q}^C$  satisfies the following equations:

$$\frac{\partial P^C(\mathbf{Q})}{\partial Q_1} + \frac{(\tau_1 - \tau_0)(r_1 - c_1)}{(\tau_0 - \tau_2)(r_2 - c_2)} \frac{\partial P^C(\mathbf{Q})}{\partial Q_2} = 0, \quad (6)$$

$$(\tau_1 - \tau_0)(r_1 - c_1)Q_1 - (\tau_0 - \tau_2)(r_2 - c_2)Q_2 = 0, \quad (7)$$

where  $\frac{\partial P^C(\mathbf{Q})}{\partial Q_1}$  and  $\frac{\partial P^C(\mathbf{Q})}{\partial Q_2}$  are given by (4) and (5), respectively.

#### 1.4. A single firm's optimal quantity with tax consideration

For any given sourcing quantity  $Q_i$  and realized demand  $D_i$ , let  $A_i$  be  $S_i$ 's pretax profits. We have

$$A_i(Q_i) = r_i \min\{Q_i, D_i\} + s_i(Q_i - D_i)^+ - c_i Q_i = (r_i - c_i)Q_i - (r_i - s_i)(Q_i - D_i)^+. \quad (8)$$

At the end of each year (period), if  $S_i$  is profitable, its profits are taxed on the internal managerial books at the managerial tax rate  $\tau$ . However, if a loss incurs, no tax will be levied. The after-tax profits or losses corresponding to  $A_i(Q_i)$  is therefore given by

$$\Pi_i(\tau, Q_i) = A_i(Q_i) - \tau A_i(Q_i)^+ = (1 - \tau)A_i(Q_i) + \tau A_i(Q_i)^-$$

where  $A_i(Q_i)^- = \min(0, A_i(Q_i))$  and  $A_i(Q_i)^+ = \max(0, A_i(Q_i))$ . The subsidiary  $S_i$ 's objective is to choose an optimal sourcing quantity  $Q_i(\tau)$  which solves the following maximization problem:

$$P_i(\tau) \equiv \max_{Q_i} \{E_{D_i}(\Pi_i(\tau, Q_i))\}. \quad (9)$$

It is easy to verify that  $A_i(Q_i)$ ,  $-A_i(Q_i)^+$  and  $A_i(Q_i)^-$  are all concave in  $Q_i$ . Thus,  $\Pi_i(\tau, Q_i)$  and  $E_{D_i}\{\Pi_i(\tau, Q_i)\}$  are also concave in  $Q_i$ . The partial derivative of the expected after-tax profits for subsidiary  $S_i$  with respect to  $Q_i$  as follows

$$\begin{aligned} \frac{\partial E_{D_i}(\Pi_i(\tau, Q_i))}{\partial Q_i} &= (1 - \tau)[(r_i - c_i)Pr\{D_i \geq Q_i\} - (c_i - s_i)Pr\{\theta_i Q_i < D_i < Q_i\}] \\ &\quad - (c_i - s_i)Pr\{D_i < \theta_i Q_i\}, \end{aligned} \quad (10)$$

where  $Pr$  represents probability.

Setting (10) to zero yields

$$Pr\{D_i < Q_i(\tau)\} = \frac{r_i - c_i}{r_i - s_i} - \frac{\tau(c_i - s_i)Pr\{D_i < \theta_i Q_i(\tau)\}}{(1 - \tau)(r_i - s_i)}. \quad (11)$$

Note that when  $\tau = 0$ ,  $Q_i(0)$  is the quantity chosen by a traditional newsvendor without tax consideration. From (11), we gain some insights on the optimal policy under the after-tax objective which are summarized in the following proposition.

**Single Firm Proposition:** (i) *The after-tax objective causes the firm to produce less (i.e.,  $Q_i(\tau) \leq Q_i(0)$ ) than the optimal sourcing quantity under the pretax objective;* (ii) *The optimal sourcing quantity  $Q_i(\tau)$  satisfies (5) in the main body of this paper.*

## 2. Proof of the Main Results

*Proof of Proposition 1* Let  $g_1(\mathbf{Q}) = \Pi_1(\tau_0, Q_1) + \Pi_2(\tau_0, Q_2)$  and  $g_2(\mathbf{Q}) = \Pi_1(\tau_1, Q_1) + \Pi_2(\tau_2, Q_2)$ . It is straightforward to see that  $E[\Pi_i(\tau, Q_i)]$  is strictly concave in  $Q_i$  under the assumption that  $f_i(\cdot)$  is strictly positive. The sum of strictly concave functions is also strictly concave. Hence,  $E[g_1(\mathbf{Q})]$  is strictly concave. By definition, we need to show  $P^C(t\mathbf{Q}_1 + (1-t)\mathbf{Q}_2) > tP^C(\mathbf{Q}_1) + (1-t)P^C(\mathbf{Q}_2)$  for the strict concavity of  $P^C(\cdot)$  for  $0 < t < 1$ .

$$\begin{aligned} P^C(t\mathbf{Q}_1 + (1-t)\mathbf{Q}_2) &= E[\min[g_1(t\mathbf{Q}_1 + (1-t)\mathbf{Q}_2), g_2(t\mathbf{Q}_1 + (1-t)\mathbf{Q}_2)]] \\ &\geq \min[E[g_1(t\mathbf{Q}_1 + (1-t)\mathbf{Q}_2)], E[g_2(t\mathbf{Q}_1 + (1-t)\mathbf{Q}_2)]] \\ &> \min[tE[g_1(\mathbf{Q}_1)] + (1-t)E[g_1(\mathbf{Q}_2)], tE[g_2(\mathbf{Q}_1)] + (1-t)E[g_2(\mathbf{Q}_2)]] \\ &= t\min E[g_1(\mathbf{Q}_1), g_2(\mathbf{Q}_1)] + (1-t)\min E[g_1(\mathbf{Q}_2), g_2(\mathbf{Q}_2)] = tP^C(\mathbf{Q}_1) + (1-t)P^C(\mathbf{Q}_2). \end{aligned}$$

The first inequality holds due to Jensen's inequality. The second strict inequality holds because of the strict concavity of  $g_1(\cdot)$  and  $g_2(\cdot)$ .  $\square$

*Proof of Proposition 2* Proposition 2 is derived by Proposition 1 and setting the first-order conditions given by equations (2) to (7) to zero.

The next result will be used for the proof of Proposition 3.

LEMMA 1. For all  $Q_i \leq Q_i(0)$ ,

$$(r_i - c_i)Pr\{D_i > Q_i\} - (c_i - s_i)Pr\{\theta_i Q_i < D_i < Q_i\} \geq 0. \quad (12)$$

*Proof of Lemma 1.* This result follows directly from the marginal after-tax profit of a subsidiary:

$$\begin{aligned} \frac{\partial E_{D_i}(\Pi_i(\tau, Q_i))}{\partial Q_i} &= (1 - \tau)[(r_i - c_i)Pr\{D_i \geq Q_i\} - (c_i - s_i)Pr\{\theta_i Q_i < D_i < Q_i\}] \\ &\quad - (c_i - s_i)Pr\{D_i < \theta_i Q_i\}. \end{aligned} \quad (13)$$

Since  $E_{D_i}[\Pi_i(0, Q_i)]$  is concave, for all  $Q_i \leq Q_i(0)$ ,  $\partial E_{D_i}[\Pi_i(0, Q_i)]/\partial Q_i \geq 0$ , namely,

$$(r_i - c_i)Pr\{D_i \geq Q_i\} - (c_i - s_i)Pr\{\theta_i Q_i < D_i < Q_i\} \geq (c_i - s_i)Pr\{D_i < \theta_i Q_i\} \geq 0.$$

*Proof of Proposition 4* For Part (i), because of the concavity of  $P^C(\mathbf{Q})$ , it suffices to show at  $Q_i = Q_i(\tau_0)$ ,  $\partial P^C(\mathbf{Q})/\partial Q_i \leq 0$  for any  $Q_j$ . We can derive the marginal profit corresponding to each of the regions in Figure 1 and show that the partial derivatives are given as below:

$$\begin{aligned} \frac{\partial P^C(\mathbf{Q})}{\partial Q_1} &= -(c_1 - s_1)[\Delta(O) + \Delta(L_1) + \Delta(L_2)] - (1 - \tau_1)(c_1 - s_1)[\Delta(C_1) + \Delta(C_2)] \\ &\quad - (1 - \tau_0)(c_1 - s_1)[\Delta(L_3) + \Delta(L_6) + \Delta(L_7)] + (1 - \tau_1)(r_1 - c_1)[\Delta(C_3) + \Delta(C_4)] \\ &\quad + (1 - \tau_0)(r_1 - c_1)[\Delta(L_4) + \Delta(L_5)]. \end{aligned} \quad (14)$$

After collapsing terms, it becomes

$$\begin{aligned} \frac{\partial P^C(\mathbf{Q})}{\partial Q_1} &= (1 - \tau_0)[(r_1 - c_1) - (r_1 - s_1)Pr\{D_1 < Q_1\}] - \tau_0(c_1 - s_1)Pr\{D_1 < \theta_1 Q_1\} \\ &\quad - (\tau_1 - \tau_0)\{(r_1 - c_1)[\Delta(C_3) + \Delta(C_4)] - (c_1 - s_1)[\Delta(C_1) + \Delta(C_2)]\}. \end{aligned} \quad (15)$$

At  $Q_1 = Q_1(\tau_0)$ , the first line of (15) vanishes. Moreover, since  $D_1$  and  $D_2$  are independent of each other,

$$\begin{aligned} \frac{\partial P^C(\mathbf{Q})}{\partial Q_1} &= (r_1 - c_1)[\Delta(C_3) + \Delta(C_4)] - (c_1 - s_1)[\Delta(C_1) + \Delta(C_2)] \\ &\leq -(\tau_1 - \tau_0)\{(r_1 - c_1)[\Delta(C_3) + \Delta(C_4)] - (c_1 - s_1)[\Delta(C_1) + \Delta(C_2) + \Delta(L_7)]\} \\ &= Pr\{D_2 < \theta_2 Q_2 + \frac{\tau_1 - \tau_0}{\tau_0 - \tau_2} \gamma_1 Q_1\}[(r_1 - c_1)Pr\{D_1 > Q_1\} - (c_1 - s_1)Pr\{\theta_1 Q_1 < D_1 < Q_1\}]. \end{aligned}$$

By Lemma 1, at  $Q_1 = Q_1(\tau_0)$ ,

$$(r_1 - c_1)Pr\{D_1 > Q_1\} - (c_1 - s_1)Pr\{\theta_1 Q_1 < D_1 < Q_1\} \geq 0.$$

Therefore, at  $Q_1 = Q_1(\tau_0)$ ,  $\frac{\partial P^C(\mathbf{Q})}{\partial Q_1} \leq 0$ . Thus, the concavity of  $P^C(\mathbf{Q})$  and Proposition 1(ii) yield  $Q_1^C \leq Q_1(\tau_0) \leq Q_1(0)$ .

Similarly, using Figure 1,

$$\begin{aligned} \frac{\partial P^C(\mathbf{Q})}{\partial Q_2} = & -(c_2 - s_2)[\Delta(O) + \Delta(C_1) + \Delta(C_4)] - (1 - \tau_0)(c_2 - s_2)[\Delta(L_1) + \Delta(L_5) + \Delta(L_6) + \Delta(L_7)] \\ & - (1 - \tau_2)(c_2 - s_2)[\Delta(C_2) + \Delta(C_3)] + (1 - \tau_0)(r_2 - c_2)[\Delta(L_2) + \Delta(L_3) + \Delta(L_4)]. \end{aligned} \quad (16)$$

After collapsing terms, it becomes

$$\begin{aligned} \frac{\partial P^C(\mathbf{Q})}{\partial Q_2} = & (1 - \tau_0)[(r_2 - c_2) - (r_2 - s_2)Pr\{D_2 < Q_2\}] - \tau_0(c_2 - s_2)Pr\{D_2 < \theta_2 Q_2\} \\ & - (\tau_0 - \tau_2)(c_2 - s_2)[\Delta(C_2) + \Delta(C_3)]. \end{aligned} \quad (17)$$

The first line of (17) vanishes at  $Q_2 = Q_2(\tau_0)$ , so

$$\frac{\partial P^C(\mathbf{Q})}{\partial Q_2} = -(\tau_0 - \tau_2)(c_2 - s_2)[\Delta(C_2) + \Delta(C_3)] \leq 0.$$

Hence, the concavity of  $P^C(\mathbf{Q})$  and Proposition 1(ii) yield  $Q_2^C \leq Q_2(\tau_0) \leq Q_2(\tau_2) \leq Q_2(0)$ .

For part (ii), we derive the marginal profit corresponding to each of the regions in Figure 2 and show that the partial derivatives of  $P^C(\mathbf{Q})$  with respect to  $Q_1$  is as follows:

$$\begin{aligned} \frac{\partial P^C(\mathbf{Q})}{\partial Q_1} = & -(c_1 - s_1)[\Delta(O) + \Delta(L_1) + \Delta(L_2)] - (1 - \tau_0)(c_1 - s_1)[\Delta(L_3) + \Delta(L_4)] \\ & - (1 - \tau_1)(c_1 - s_1)[\Delta(C_1) + \Delta(C_2) + \Delta(C_3) + \Delta(C_6) + \Delta(C_7))] \\ & + (1 - \tau_1)(r_1 - c_1)[\Delta(C_4) + \Delta(C_5) + \Delta(C_8)]. \end{aligned} \quad (18)$$

After collapsing terms,

$$\begin{aligned} \frac{\partial P^C(\mathbf{Q})}{\partial Q_1} = & (1 - \tau_1)[(r_1 - c_1) - (r_1 - s_1)Pr\{D_1 \leq Q_1\}] - \tau_1(c_1 - s_1)Pr\{D_1 \leq \theta_1 Q_1\} \\ & - (\tau_1 - \tau_0)(c_1 - s_1)[\Delta(L_3) + \Delta(L_4)]. \end{aligned} \quad (19)$$

At  $Q_1 = Q_1(\tau_1)$ , the first line of (19) vanishes, so

$$\frac{\partial P^C(\mathbf{Q})}{\partial Q_1} = -(\tau_1 - \tau_0)(c_1 - s_1)[\Delta(L_3) + \Delta(L_4)] \leq 0.$$

Therefore, the concavity of  $P^C(\mathbf{Q})$  and Proposition 1(ii) yield  $Q_1^C \leq Q_1(\tau_1) \leq Q_1(\tau_0) \leq Q_1(0)$ .

Similarly, using Figure 2 and the definitions of its areas, the global firm's marginal profit with respect to  $Q_2$  is as follows:

$$\begin{aligned} \frac{\partial P^C(\mathbf{Q})}{\partial Q_2} = & -(c_2 - s_2)[\Delta(O) + \Delta(C_1) + \Delta(C_7) + \Delta(C_8)] - (1 - \tau_2)(c_2 - s_2)[\Delta(C_2) + \Delta(C_5) + \Delta(C_6)] \\ & + (1 - \tau_2)(r_2 - c_2)[\Delta(C_3) + \Delta(C_4)] - (1 - \tau_0)(c_2 - s_2)[\Delta(L_1) + \Delta(L_4)] \\ & + (1 - \tau_0)(r_2 - c_2)[\Delta(L_2) + \Delta(L_3)]. \end{aligned} \quad (20)$$

After collapsing terms,

$$\begin{aligned} \frac{\partial P^C(\mathbf{Q})}{\partial Q_2} &= (1 - \tau_2)[(r_2 - c_2) - (r_2 - s_2)Pr\{D_2 \leq Q_2\}] - \tau_2(c_2 - s_2)Pr\{D_2 \leq \theta_2 Q_2\} \\ &\quad - (\tau_0 - \tau_2)\{(r_2 - c_2)[\Delta(L_2) + \Delta(L_3)] - (c_2 - s_2)[\Delta(L_1) + \Delta(L_4)]\}. \end{aligned} \quad (21)$$

At  $Q_2 = Q_2(\tau_2)$ ,

$$\begin{aligned} \frac{\partial P^C(\mathbf{Q})}{\partial Q_2} &= -(\tau_0 - \tau_2)\{(r_2 - c_2)[\Delta(L_2) + \Delta(L_3)] - (c_2 - s_2)[\Delta(L_1) + \Delta(L_4)]\} \\ &\leq -(\tau_0 - \tau_2)\{(r_2 - c_2)[\Delta(L_2) + \Delta(L_3)] - (c_2 - s_2)[\Delta(L_1) + \Delta(L_4) + \Delta(C_2)]\} \\ &= -(\tau_0 - \tau_2)Pr\{D_1 < \theta_1 Q_1 + \frac{\tau_0 - \tau_2}{\tau_1 - \tau_0}\gamma_2 Q_2\}[(r_2 - c_2)Pr\{D_2 > Q_2\} \\ &\quad - (c_2 - s_2)Pr\{\theta_2 Q_2 < D_2 < Q_2\}] \leq 0. \end{aligned} \quad (22)$$

because of Lemma 1. Hence, the concavity of  $P^C(\mathbf{Q})$  and Proposition 1(ii) yield  $Q_2^C \leq Q_2(\tau_2) \leq Q_2(0)$ .

*Proof of Corollary 1* Under all three conditions,  $dQ_{2j}^C/d\tau_0$  must be decreasing in  $\tau_0$  as subsidiary  $S_2$  is subject to home tax rate  $\tau_0$  although under certain demand realizations, the excess tax liability may be partially offset by the tax credit generated from subsidiary  $S_1$ . The strict proof is shown below. From (15),

$$\frac{\partial^2 P^C(\mathbf{Q})}{\partial Q_1 \partial \tau_0} = -(c_1 - s_1)[\Delta(L_2) + \Delta(L_4) + (\tau_1 - \tau_0)\frac{d(\Delta(L_3) + \Delta(L_4))}{d\tau_0}] \leq 0.$$

As shown in Figure 2, as  $\tau_0$  increase, the line  $Q_1 = \theta_1 Q_1 + \frac{(\tau_1 - \tau_0)}{(\tau_0 - \tau_2)}\gamma_2 Q_2$  shifts to the right as  $\tau_0$  increases. Thus,  $\Delta(L_3)$  and  $\Delta(L_4)$  increase.

$$\frac{\partial^2 P^C(\mathbf{Q})}{\partial Q_1 \partial Q_2} = -(\tau_1 - \tau_0)(c_1 - s_1)\frac{d(\Delta(L_3) + \Delta(L_4))}{dQ_2} \geq 0,$$

and

$$\begin{aligned} \frac{\partial^2 P^C(\mathbf{Q})}{\partial Q_2 \partial \tau_0} &= -\{(r_2 - c_2)[\Delta(L_2) + \Delta(L_3)] - (c_2 - s_2)[\Delta(L_1) + \Delta(L_4)]\} \\ &\quad - (\tau_0 - \tau_2)\{(r_2 - c_2)\frac{d(\Delta(L_2) + \Delta(L_3))}{d\tau_0} - (c_2 - s_2)\frac{d(\Delta(L_1) + \Delta(L_4))}{d\tau_0}\} \leq 0. \end{aligned}$$

From Figure 2,  $\Delta L_2$  and  $\Delta L_1$  do not change as  $\tau_0$  increases. Moreover,

$$\begin{aligned} &(r_2 - c_2)\frac{d\Delta L_3}{d\tau_0} - (c_2 - s_2)\frac{d\Delta(L_4)}{d\tau_0} \\ &\geq ((r_2 - c_2)Pr\{D_2 > Q_2\} - (c_2 - s_2)Pr\{Pr\{\theta_2 Q_2 \leq D_2 \leq Q_2\}f(\theta_1 Q_1 + \frac{\tau_0 - \tau_2}{\tau_1 - \tau_0}\gamma_2 Q_2)\frac{\tau_1 - \tau_2}{(\tau_1 - \tau_0)^2}) \geq 0. \end{aligned}$$

Hence,  $\frac{\partial^2 P^C(\mathbf{Q})}{\partial Q_2 \partial \tau_0} \leq 0$ . The concavity of  $P^C(\cdot)$  yields  $dQ_{2C}^C/d\tau_0 \leq 0$ . Above three inequalities and the concavity of  $P^C(\cdot)$  implies  $dQ_{iC}^C/d\tau_0 < 0$ ,  $i = 1, 2$ .



The proof of  $dQ_{1L}^C/d\tau_0 \leq 0$  and  $dQ_{2L}^C/d\tau_0 \leq 0$  can be shown similarly. Under condition  $L$ ,

$$\begin{aligned} \frac{\partial^2 P^C(\mathbf{Q})}{\partial Q_1 \partial Q_2} &= -(\tau_1 - \tau_0) \left\{ (r_1 - c_1) \frac{d[\Delta(C_3) + \Delta(C_4)]}{dQ_2} - (c_1 - s_1) \frac{d[\Delta(C_1) + \Delta(C_2)]}{dQ_2} \right\} \\ &= \theta_2 f(\theta_2 Q_2 + \frac{\tau_1 - \tau_0}{\tau_0 - \tau_2} \gamma_1 Q_1) (\tau_1 - \tau_0) \{ (r_1 - c_1) \Pr\{D_1 > Q_1\} - (c_1 - s_1) \Pr\{\theta_1 Q_1 < D_1 < Q_1\} / 2 \} \geq 0. \end{aligned}$$

Similarly,  $\frac{\partial P^C(\mathbf{Q})}{\partial Q_i \partial \tau_0} \leq 0$ .

Under condition  $E$ , the line  $D_2 = \theta_2 Q_2 + \frac{\tau_1 - \tau_0}{\tau_0 - \tau_2} \gamma_1 Q_1$  merges with  $D_2 = Q_2$  in Figure 1 and the line  $D_1 = \theta_1 Q_1 + \frac{\tau_0 - \tau_2}{\tau_1 - \tau_0} \gamma_2 Q_2$  merges with  $D_1 = Q_1$ . As a result, Figures 1 and 2 become identical. Additionally, tax liability exactly equals tax credit when both subsidiaries sell up inventory, i.e.,  $(\tau_1 - \tau_0)(r_1 - c_1)Q_1 = (\tau_0 - \tau_2)(r_2 - c_2)Q_2$ .

Here is a simpler proof of the monotonicity of  $\mathbf{Q}^C$  with respect to  $\tau_0$ . Under condition  $L$  or  $C$ ,  $\mathbf{Q}^C$  satisfies the first-order conditions.  $dQ_i^C/d\tau_0 \leq 0$  yields directly from the strict concavity of  $P^C(\mathbf{Q})$  and  $\frac{\partial^2 P^C(\mathbf{Q})}{\partial Q_i \partial \tau_0} \leq 0$ ,  $\frac{\partial^2 P^C(\mathbf{Q})}{\partial Q_1 \partial Q_2} \geq 0$  and the Envelop Theorem. Under condition  $E$ ,  $u = 0$ . Complete differentiating the equality with respect to  $\tau_0$  yields

$$-(r_1 - c_1)Q_{1E}^C - (r_2 - c_2)Q_{2E}^C = -(\tau_1 - \tau_0)(r_1 - c_1) \frac{dQ_{1E}^C}{d\tau_0} + (\tau_0 - \tau_2)(r_2 - c_2) \frac{dQ_{2E}^C}{d\tau_0}.$$

Since  $(\tau_0 - \tau_2) \left| \frac{dQ_{2E}^C}{d\tau_0} \right| \leq Q_{2E}^C$  and  $Q_{1E}^C \geq -(\tau_1 - \tau_0) \frac{dQ_{1E}^C}{d\tau_0}$ , for the equation above to hold,  $\frac{dQ_{1E}^C}{d\tau_0} \geq 0$  must hold.  $\square$

*Proof of Corollary 2* Let  $t$  be the Lagrange multiplier, the new objective function can be rewritten as

$$L(\mathbf{Q}; \tau_0) = P^C(\mathbf{Q}; \tau_0) + t[u - (\tau_1 - \tau_0)(r_1 - c_1)Q_1 + (\tau_0 - \tau_2)(r_2 - c_2)Q_2].$$

The optimal solution satisfies

$$\begin{aligned} \frac{\partial P^C(\mathbf{Q}; \tau_0)}{\partial Q_1} &= t(\tau_1 - \tau_0)(r_1 - c_1) & \frac{\partial P^C(\mathbf{Q}; \tau_0)}{\partial Q_2} &= -t(\tau_0 - \tau_2)(r_2 - c_2), \\ ut &= 0 & u &= (\tau_1 - \tau_0)(r_1 - c_1)Q_1 - (\tau_0 - \tau_2)(r_2 - c_2)Q_2. \end{aligned}$$

note that at  $\tau_0 = \tau_2$ ,  $u > 0$  for  $\mathbf{Q} \neq 0$ , i.e.,  $C$  condition holds and at  $\tau_0 = \tau_1$ ,  $u < 0$ , i.e., the **ex ante** condition  $L$  holds. As shown below, as  $\tau_0$  increases within the range of  $[\tau_2, \tau_1]$ ,  $u$  decreases.

$$\frac{du}{d\tau_0} = -(r_1 - c_1)Q_1^C - (r_2 - c_2)Q_2^C + (\tau_1 - \tau_0)(r_1 - c_1)dQ_1^C/d\tau_0 - (\tau_0 - \tau_2)(r_2 - c_2)dQ_2^C/d\tau_0.$$

Note that  $(r_i - c_i)Q_i$  is subsidiary  $i$ 's maximum profit with excess demand. The first-order impact of  $\tau_0$  on tax credit (liability) must dominate the absolute value of the second order effect; i.e.,  $Q_1^C \geq (\tau_1 - \tau_0)|dQ_1^C/d\tau_0|$  and  $Q_2^C \geq (\tau_0 - \tau_2)(r_2 - c_2)|dQ_2^C/d\tau_0|$  because the probability of cross-crediting is strictly less than 1 and at the two extreme points (i.e.,  $\tau_0 = \tau_2, \tau_1$ ,  $Q_i^C > 0$ ). Hence,  $\frac{du}{d\tau_0} \leq 0$ . Consequently, there must exist two threshold values,  $\tau_2 \leq \hat{\tau}_0 \leq \tilde{\tau}_0 \leq \tau_1$  such that condition  $C$  holds for  $\tau_0 \in [\tau_2, \hat{\tau}_0]$ ;  $E$  condition holds for  $\tau_0 \in [\hat{\tau}_0, \tilde{\tau}_0]$ ; and for  $\tau \in (\tilde{\tau}_0, \tau_1]$ ,  $L$  condition holds.  $\square$

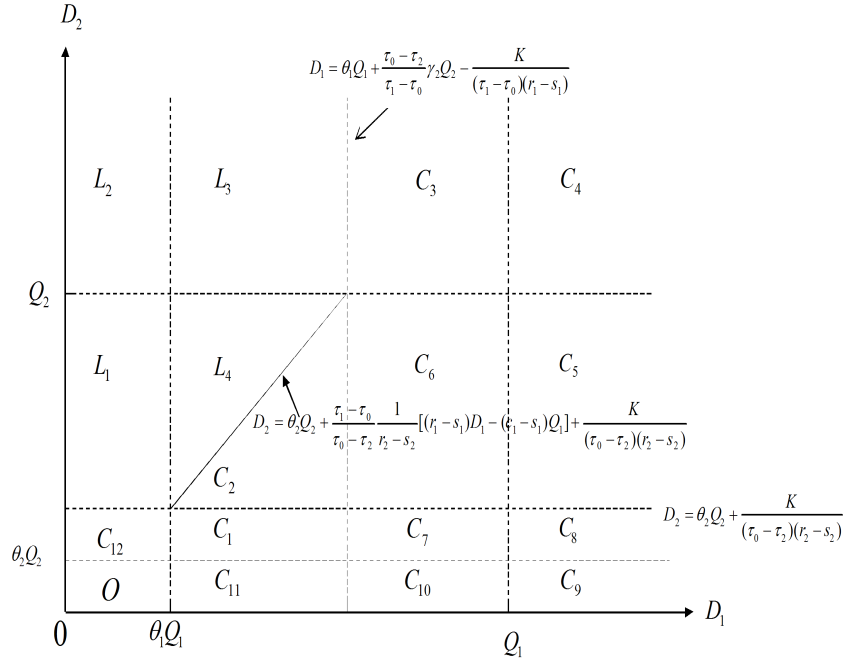

**Figure 3 Demand Realization Regions**

*Proof of Proposition 5* Part (i) holds because,  $Q_i(0)$  deviates further away from the optimal quantity  $Q_i^C$  than  $\mathbf{Q}(\mathcal{D}_h)$  and  $\mathbf{Q}(\mathcal{D}_1)$ , respectively and the concavity of  $P^C(\mathbf{Q})$ . First, from definition (??),  $P(\tau_0; \mathbf{Q})$  is non-increasing and continuous in  $\tau_0$  for  $\tau_0 \in (\tau_2, \tau_1)$  and any  $\mathbf{Q}$ . Hence,  $P(\tau_0; \mathbf{Q}(\mathcal{D}_h)), P(\tau_0; \mathbf{Q}(\mathcal{D}_1))$  and  $P(\tau_0; \mathbf{Q}^C)$  are all non-increasing in  $\tau_0$ . At  $\tau_0 = \tau_2$ ,  $\mathbf{Q}^C = \mathbf{Q}(\mathcal{D}_1)$ , and  $\mathcal{D}_l$  is suboptimal for all  $\tau_0 > \tau_2$ , so at  $\tau_0 = \tau_2$ ,  $P(\tau_0; \mathbf{Q}(\mathcal{D}_1)) = P(\mathbf{Q}^C) > P(\tau_0; \mathbf{Q}(\mathcal{D}_h))$ . Similarly, at  $\tau_0 = \tau_1$ ,  $\mathbf{Q}^C = \mathbf{Q}(\mathcal{D}_h)$ ; for  $\tau_0 \in (\tau_2, \tau_1)$ ,  $\mathbf{Q}(\mathcal{D}_h)$  is suboptimal. Hence,  $P(\tau_0; \mathbf{Q}^C) = P(\tau_0, \mathbf{Q}(\mathcal{D}_1)) > P(\tau_0, \mathbf{Q}(\mathcal{D}_h))$ .

To show (ii), we next establish that  $P(\tau_0; \mathbf{Q})$  is Lipschitz continuous in  $\tau_0$ . From (??), for any  $\tau_0^1, \tau_0^2 \in (\tau_2, \tau_1)$  with  $\tau_0^1 < \tau_0^2$ ,

$$\left| \frac{P(\tau_0^1; \mathbf{Q}) - P(\tau_0^2; \mathbf{Q})}{\tau_0^1 - \tau_0^2} \right| \leq (A_1^+ + A_2^+) \leq \sum_1^2 (r_i - c_i) Q_i.$$

The monotonicity and continuity of  $P(\tau_0; \mathbf{Q})$  in  $\tau_0$  guarantee there exists a  $\tilde{\tau}_0 \in (\tau_2, \tau_1)$ , for  $\tau_0 \in (\tau_2, \tilde{\tau}_0)$ ,  $P(\tau_0; \mathbf{Q}(\mathcal{D}_1)) > P(\tau_0; \mathbf{Q}(\mathcal{D}_h))$  and the opposite holds for  $\tau_0 \in (\tilde{\tau}_0, \tau_1)$ .  $\square$

*Proof of Proposition 6* This proposition is a direct result of Proposition 1.4 in Appendix 1.4.  $\square$

*Proof of Propositions 7 and 8* The proof is embedded in the main body of the paper.  $\square$

### 3. Marginal Profit for the Extensions

#### 3.1. FTC Carry-Forward

Under the revised ex ante  $L$  condition, i.e.,

$$(\tau_0 - \tau_2)(r_2 - c_2)Q_2 - (\tau_1 - \tau_0)(r_1 - c_1)Q_1 > K,$$

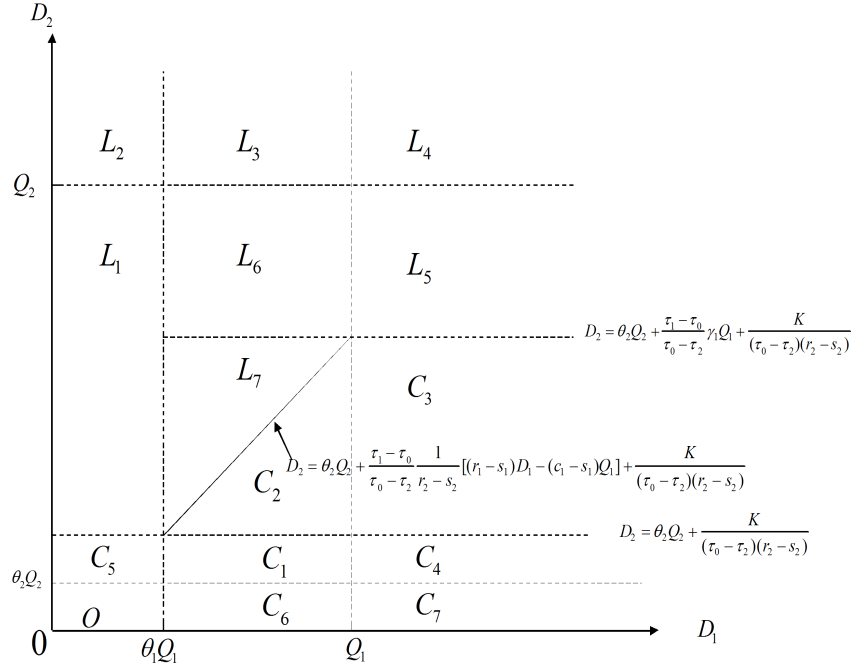

**Figure 4 Demand Realization Regions**

the demand realization space can be partitioned as in Figure 4. Following a similar analysis as in Section 4, the MNF's marginal expected profits with respect to  $Q_i$  are

$$\begin{aligned}
 \frac{\partial P_1^C(\mathbf{Q}; K)}{\partial Q_1} &= (1 - \tau_0) \{ (r_1 - c_1) Pr\{D_1 > Q_1\} - (c_1 - s_1) Pr\{\theta_1 Q_1 < D_1 < Q_1\} \} \\
 &\quad - (c_1 - s_1) Pr\{D_1 < \theta_1 Q_1\} \\
 &\quad - (\tau_1 - \tau_0) \{ (r_1 - c_1) [\Delta(C_3) + \Delta(C_4) + \Delta(C_7)] - (c_1 - s_1) [\Delta(C_1) \\
 &\quad + \Delta(C_2) + \Delta(C_6)] \}
 \end{aligned} \tag{23}$$

and

$$\begin{aligned}
 \frac{\partial P_1^C(\mathbf{Q}; K)}{\partial Q_2} &= (1 - \tau_0) \{ (r_2 - c_2) Pr\{D_2 > Q_2\} - (c_2 - s_2) Pr\{\theta_2 Q_2 < D_2 < Q_2\} \} \\
 &\quad - (c_2 - s_2) Pr\{D_2 < \theta_2 Q_2\} \\
 &\quad - (\tau_0 - \tau_2) (c_2 - s_2) [\Delta(C_1) + \Delta(C_2) + \Delta(C_3) + \Delta(C_4) + \Delta(C_5)].
 \end{aligned} \tag{24}$$

Under the revised ex ante condition  $C$ ,

$$(\tau_1 - \tau_0)(r_1 - c_1)Q_1 + K > (\tau_0 - \tau_2)(r_2 - c_2)Q_2,$$

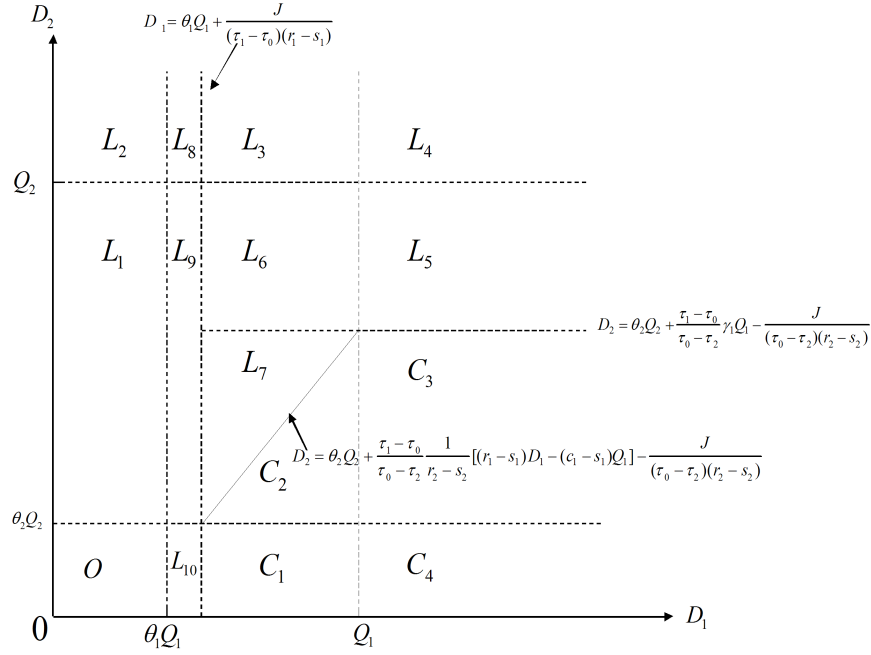

Figure 5 Demand Realization Regions

the demand realization space can be partitioned as in Figure 3. After a few transformations, the MNF's marginal profits can be written as

$$\begin{aligned} \frac{\partial P_1^C(\mathbf{Q}; K)}{\partial Q_1} &= (1 - \tau_1) \{ (r_1 - c_1) Pr\{D_1 > Q_1\} - (c_1 - s_1) Pr\{\theta_1 Q_1 < D_1 < Q_1\} \} \\ &\quad - (c_1 - s_1) Pr\{D_1 < \theta_1 Q_1\} \\ &\quad - (\tau_1 - \tau_0)(c_1 - s_1) [\Delta(L_3) + \Delta(L_4)] \end{aligned} \quad (25)$$

and

$$\begin{aligned} \frac{\partial P_1^C(\mathbf{Q}; K)}{\partial Q_2} &= (1 - \tau_2) \{ (r_2 - c_2) Pr\{D_2 > Q_2\} - (c_2 - s_2) Pr\{\theta_2 Q_2 < D_2 < Q_2\} \} \\ &\quad - (c_2 - s_2) Pr\{D_2 < \theta_2 Q_2\} \\ &\quad - (\tau_0 - \tau_2) \{ (r_2 - c_2) [\Delta(L_2) + \Delta(L_3)] - (c_2 - s_2) [\Delta(L_1) + \Delta(L_4)] \}. \end{aligned} \quad (26)$$

### 3.2. FTC Carry-Back

Under the revised *ex ante*  $L$  condition

$$(\tau_0 - \tau_2)(r_2 - c_2)Q_2 + J > (\tau_1 - \tau_0)(r_1 - c_1)Q_1,$$

the demand realization space can be described by Figure 5. Using Figure 5, the MNF's marginal expected profit with respect to  $Q_1$  is

$$\begin{aligned} \frac{\partial P_2^C(\mathbf{Q}; J)}{\partial Q_1} &= (1 - \tau_0) [(r_1 - c_1) Pr\{D_1 > Q_1\} - (c_1 - s_1) Pr\{\theta_1 Q_1 < D_1 < Q_1\}] \\ &\quad - (c_1 - s_1) Pr\{D_1 < \theta_1 Q_1\} \\ &\quad - (\tau_1 - \tau_0) [(r_1 - c_1) [\Delta(C_3) + \Delta(C_4)] - (c_1 - s_1) [\Delta(C_1) + \Delta(C_2)]], \end{aligned} \quad (27)$$

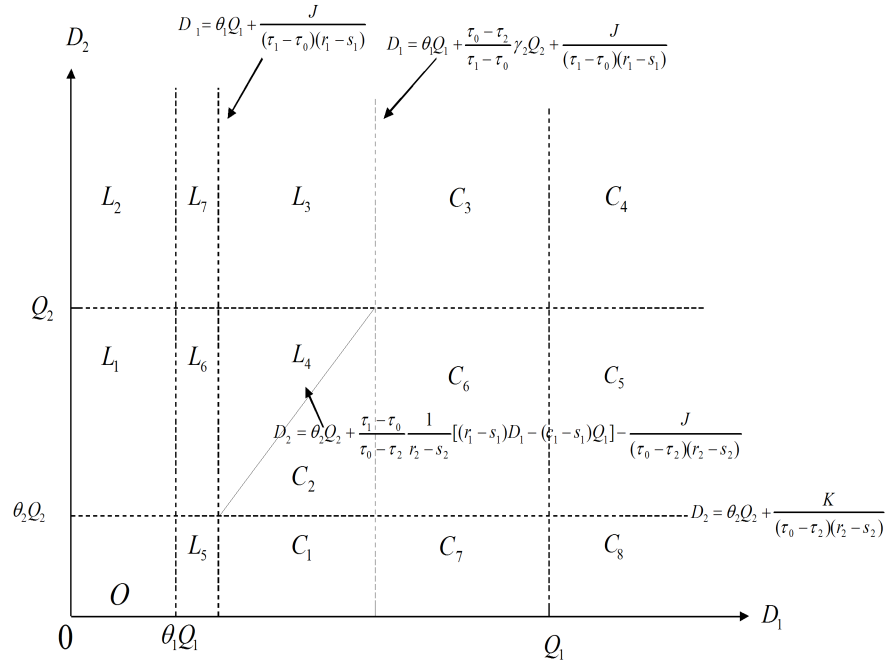

Figure 6 Demand Realization Regions

and that with respect to  $Q_2$  is

$$\begin{aligned} \frac{\partial P_2^C(\mathbf{Q}; J)}{\partial Q_2} &= (1 - \tau_0)[(r_2 - c_2)Pr\{D_2 > Q_2\} - (c_2 - s_2)Pr\{\theta_2 Q_2 < D_2 < Q_2\} \\ &\quad - (c_2 - s_2)Pr\{D_2 < \theta_2 Q_2\} \\ &\quad - (\tau_0 - \tau_2)(c_2 - s_2)[\Delta(C_2) + \Delta(C_3)]. \end{aligned} \quad (28)$$

Under the revised **ex ante** condition  $C$

$$(\tau_0 - \tau_2)(r_2 - c_2)Q_2 + J < (\tau_1 - \tau_0)(r_1 - c_1)Q_1,$$

the demand space can be partitioned as in Figure 6. The MNF's marginal profits are as below:

$$\begin{aligned} \frac{\partial P_2^C(\mathbf{Q}; J)}{\partial Q_1} &= (1 - \tau_1)[(r_1 - c_1)Pr\{D_1 > Q_1\} - (c_1 - s_1)Pr\{\theta_1 Q_1 < D_1 < Q_1\}] \\ &\quad - (c_1 - s_1)Pr\{D_1 < \theta_1 Q_1\} \\ &\quad + (\tau_1 - \tau_0)[-(c_1 - s_1)[\Delta(L_3) + \Delta(L_4) + \Delta(L_5) + \Delta(L_6) + \Delta(L_7)] \end{aligned} \quad (29)$$

and

$$\begin{aligned} \frac{\partial P_2^C(\mathbf{Q}; J)}{\partial Q_2} &= (1 - \tau_2)[(r_2 - c_2)Pr\{D_2 > Q_2\} - (c_2 - s_2)Pr\{\theta_2 Q_2 < D_2 < Q_2\} \\ &\quad - (c_2 - s_2)Pr\{D_2 < \theta_2 Q_2\} \\ &\quad - (\tau_0 - \tau_2)[(r_2 - c_2)[\Delta(L_2) + \Delta(L_3) + \Delta(L_7)] \\ &\quad - (c_2 - s_2)[\Delta(L_1) + \Delta(L_4) + \Delta(L_6)]. \end{aligned} \quad (30)$$

### 3.3. Loss Carry-Forward

The demand spaces partitions under the revised **ex ante**  $L$  and  $C$  conditions are shown in Figures 7 and 8, respectively. By comparing Figures 7 and 8 with Figures 1 and 2, respectively, it is clear that four of the boundary lines have shifted upward (or to the right) by a constant,  $T_2/(r_2 + s_2)$ . As a consequence, the marginal profits of the MNF will have the identical expressions as in Section 4, although the boundaries for some of regions have be adjusted by a constant. Hence, we omit the equations for the MNF's marginal profits here for brevity.

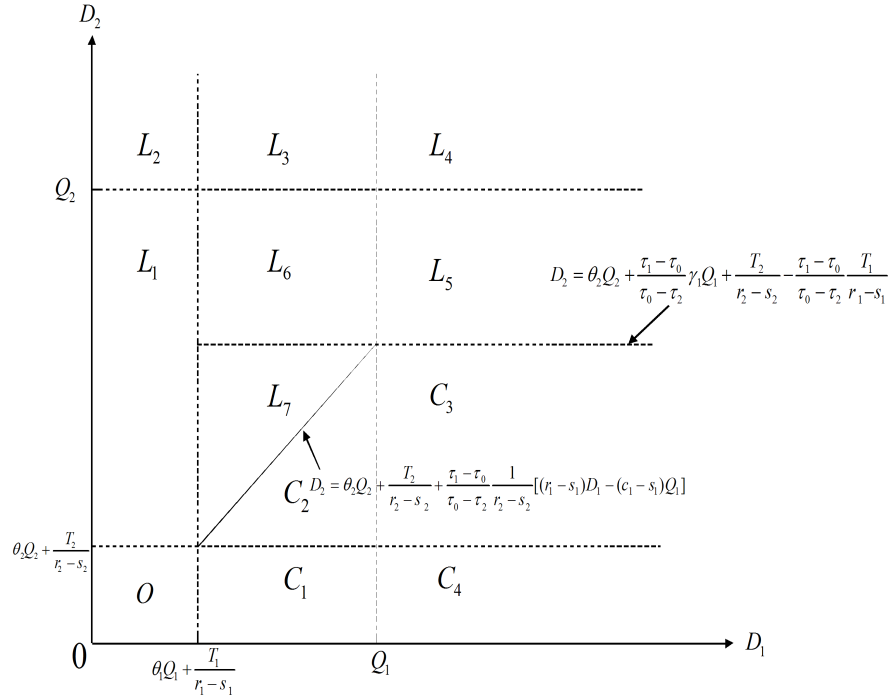

Figure 7 Demand Realization Regions

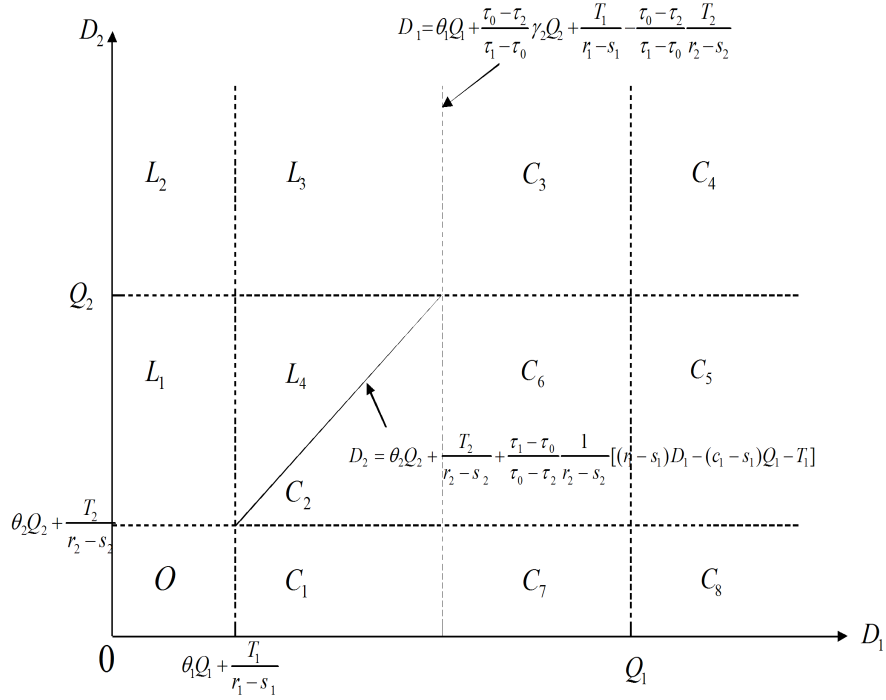

Figure 8 Demand Realization Regions

### 3.4. Loss Carry-Back

The global firm's after-tax profits with loss carry-back can be expressed as:

$$\Pi_4^C(\mathbf{Q}; Y) = \Pi^C(\mathbf{Q}) + \tau_0 \min\{-A_2^-, Y\},$$

where  $\Pi^C(\mathbf{Q})$ , defined in Section 3, is the expected after-tax profit without loss carry-back consideration. Since the last term in of  $\Pi_4^C$  is independent of  $S_1$ 's decision. Moreover, the tax cross-averaging effect and tax refund will not occur simultaneously. Let  $P_4^C(\mathbf{Q}) \equiv E_{\mathbf{D}} \Pi_4^C(\mathbf{Q}; Y)$ . We have the following partial derivatives:

$$\begin{aligned} \frac{\partial P_4^C(\mathbf{Q}; Y)}{\partial Q_1} &= \frac{\partial P^C(\mathbf{Q})}{\partial Q_1}, \\ \frac{\partial P_4^C(\mathbf{Q}; Y)}{\partial Q_2} &= \frac{\partial P^C(\mathbf{Q})}{\partial Q_2} + \tau_0(c_2 - s_2)Pr\{\theta_2 Q_2 > D_2 > \theta_2 Q_2 - \frac{Y}{r_2 - s_2}\}. \end{aligned}$$
